# Supplementary material for: Ferroelectric mesocrystalline BaTiO3/BaBi4Ti4O15 nanocomposite: formation mechanism, nanostructure, and anomalous ferroelectric response
Source: Royal Society of Chemistry journal article supplement (doi:10.1039/c8nr07587e), 2018-11-26
Supplement: c8nr07587e1.pdf [file c8nr07587e1.pdf]

## Supplementary Information

### **Ferroelectric Mesocrystalline BaTiO<sub>3</sub>/BaBi<sub>4</sub>Ti<sub>4</sub>O<sub>15</sub> Nanocomposite: Formation Mechanism, Nanostructure, and Anomalous Ferroelectric Response**

**Wenxiong Zhang,<sup>a</sup> Sen Li,<sup>a</sup> Hao Ma,<sup>a</sup> Dengwei Hu,<sup>b</sup> Xingang Kong,<sup>c</sup> Shinobu  
Uemura,<sup>a</sup> Takafumi Kusunose,<sup>a</sup> and Qi Feng\*<sup>a</sup>**

<sup>a</sup> *Faculty of Engineering and Design, Kagawa University, 2217-20 Hayashi-cho, Takamatsu-shi, 761-0396 Japan*

<sup>b</sup> *College of Chemistry and Chemical Engineering, Baoji University of Arts and Sciences, 1 Hi-Tech Avenue, Baoji, Shaanxi, 721013 P. R. China.*

<sup>c</sup> *School of Materials Science and Engineering, Shaanxi University of Science and Technology, Weiyang, Xi'an, Shaanxi, 710021 PR China*

---

\* E-mail: feng@eng.kagawa-u.ac.jp

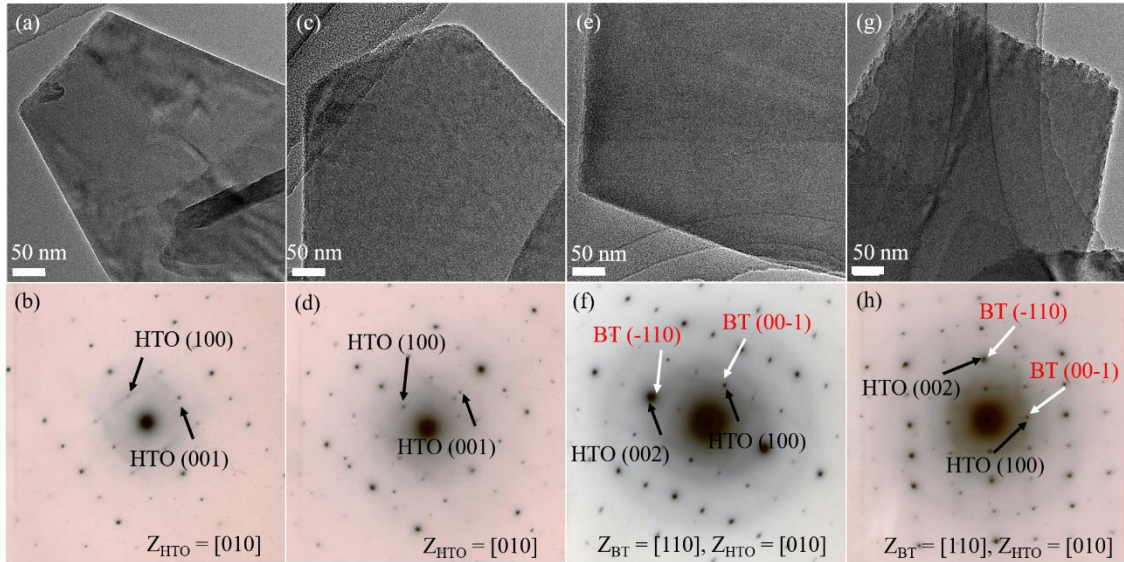

**Figure. S1.** (a, c, e, g) TEM images and (b, d, f, h) SAED patterns of (a, b) HTO, (c, d) BT/HTO-0.25, (e, f) BT/HTO-0.5 and (g, h) BT/HTO-0.75.

According to Figure. S1, it is obvious that all the samples exhibit the platelike morphology. HTO and BT/HTO-0.25 exhibit the SAED patterns of the single crystal of layered titanate with a [010] crystal-axis orientation. BT/HTO-0.5 and BT/HTO-0.75 exhibit the SAED patterns of mesocrystalline BT/HTO nanocomposite, where the single-crystal-like SAED patterns of BT and HTO are observed.

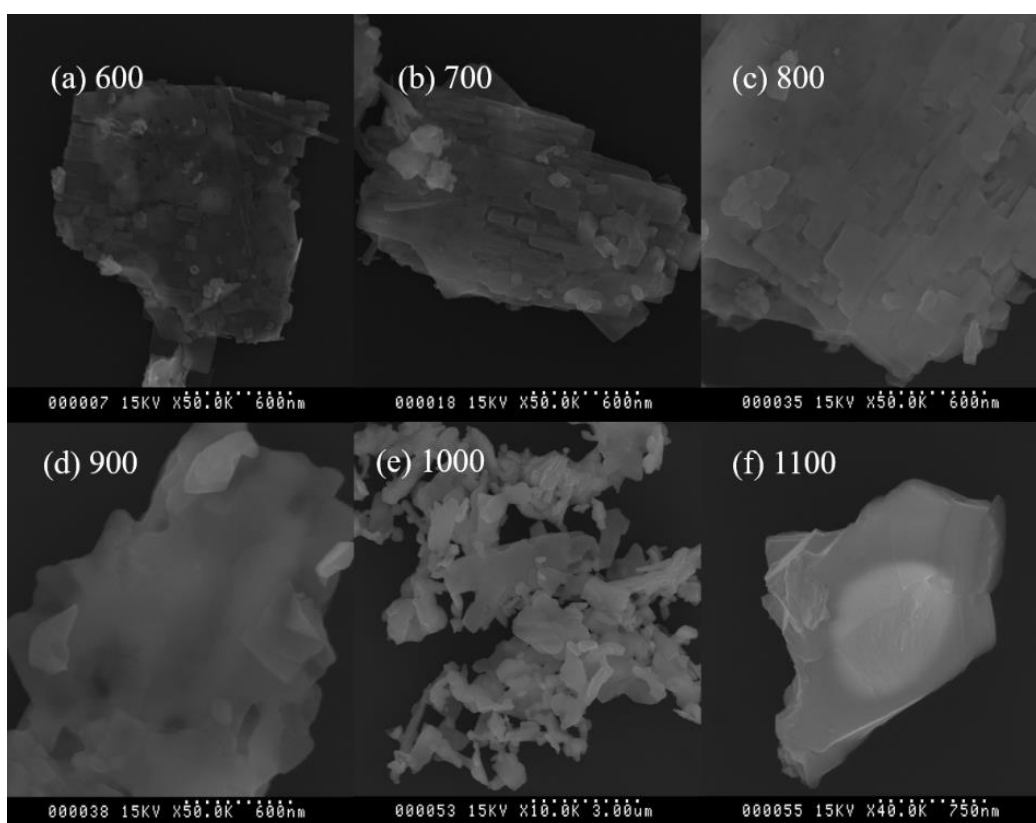

**Figure. S2.** FE-SEM images of the samples obtained by the heat-treatment of the (BT/HTO-0.5)- $\text{Bi}_2\text{O}_3$  mixture at different temperatures for 3 h.

The platelike particle morphology of the BT/HTO precursor are retained up to 900 °C, and then destructed over 1000 °C with increasing the heating temperature.

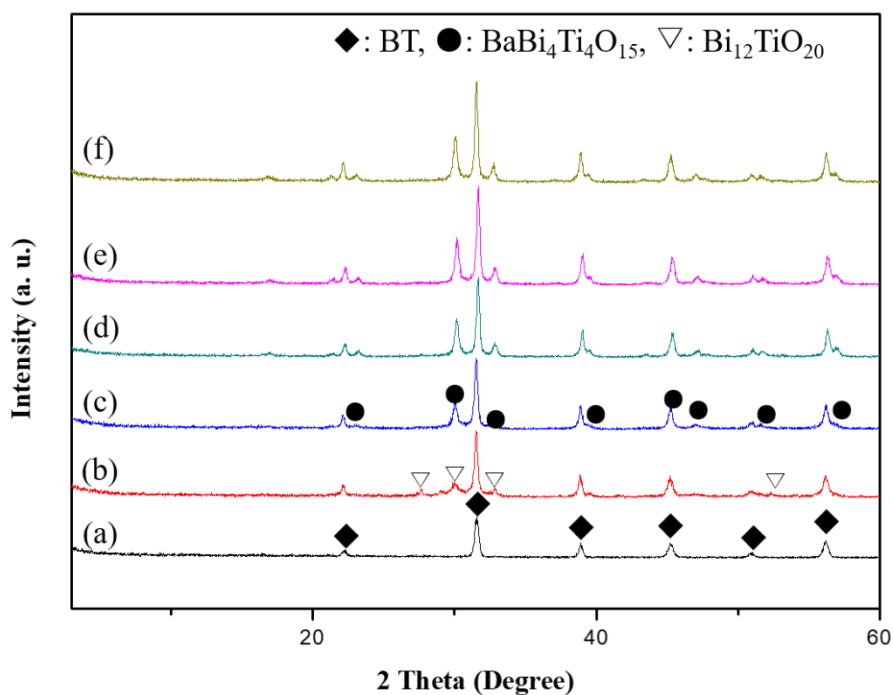

**Figure. S3.** XRD patterns of samples obtained by heat-treatments of (a) BT mesocrystal at 800 °C for 3 h and (BT/HTO-0.75)-Bi<sub>2</sub>O<sub>3</sub> mixture at (b) 600, (c) 700, (d) 800 (e) 900 and (f) 1100 °C for 3 h.

Figure. S3 shows the XRD patterns of samples obtained by heat-treatment of BT mesocrystal at 800 °C for 3 h and (BT/HTO-0.75)-Bi<sub>2</sub>O<sub>3</sub> mixture at different temperatures for 3 h. The formation of the BT phase can be clearly seen from the XRD result. In the (BT/HTO-0.75)-Bi<sub>2</sub>O<sub>3</sub> reaction system, with increasing the heating temperature, the BT phase and a new phase of Bi<sub>12</sub>TiO<sub>20</sub> were observed when the heating temperature reached 600 °C, the mixtures of BT and BBT phases were obtained in the temperature range above 700 °C.

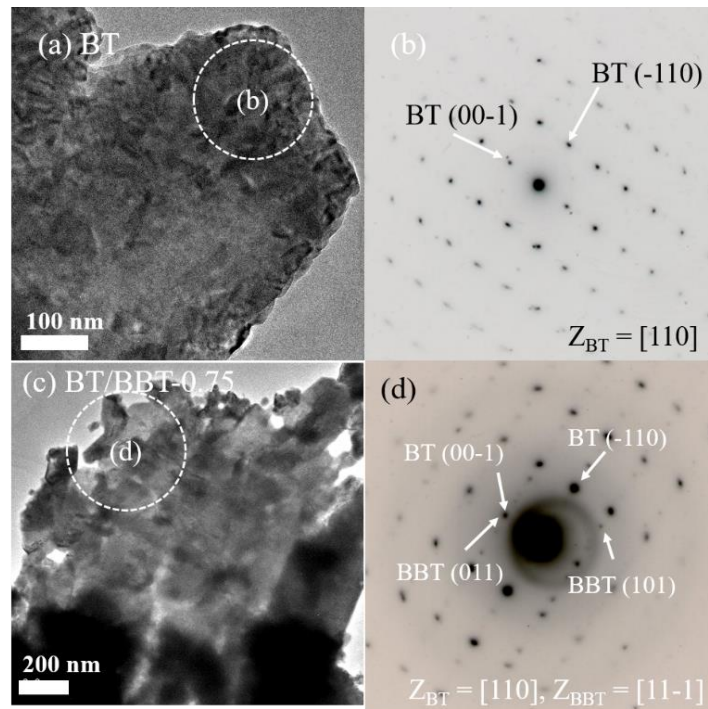

**Figure. S4.** (a, c) TEM images and (b, d) SAED spot patterns of samples obtained by heat-treatment of (a, b) the BT mesocrystal and (c, d) (BT/HTO-0.75)- $\text{Bi}_2\text{O}_3$  mixture at 800 °C for 3 h, respectively.

The platelike BT-800 particle is a polycrystal constructed from the BT nanocrystals, and each nanocrystals show the same crystal-axis orientation along the [110] direction, namely the formation of the BT mesocrystal. The platelike BT/BBT-0.75-800 sample also exhibits the platelike morphology. Two sets of SAED spots corresponding to BT and BBT can be observed simultaneously in one particle, namely BT/BBT-0.75 is a mesocrystalline BT/BBT nanocomposite.

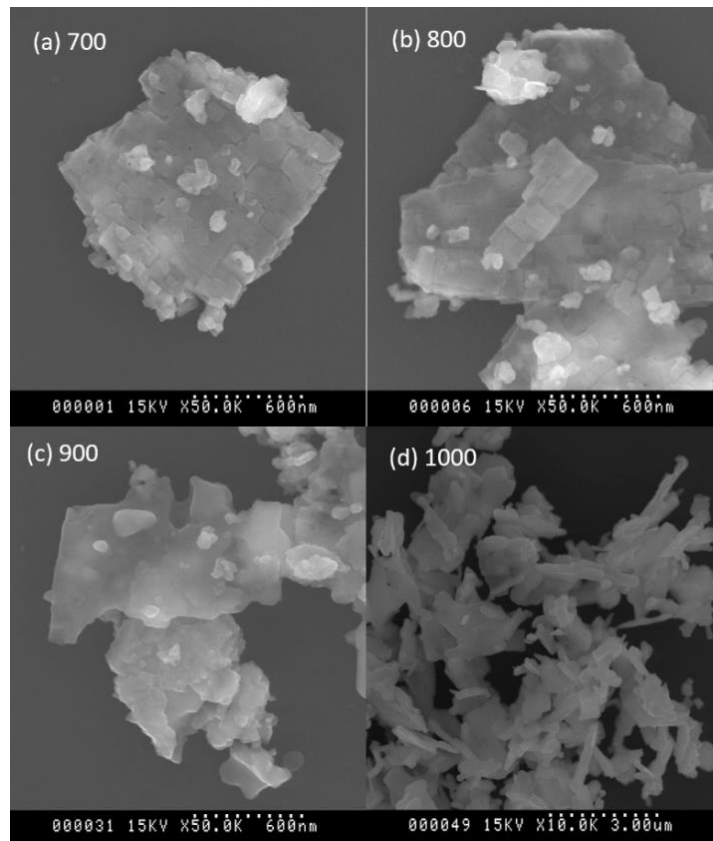

**Figure. S5.** FE-SEM images of samples obtained by heat-treatment of (BT/HTO-0.25)-Bi<sub>2</sub>O<sub>3</sub> mixture at different temperatures for 3 h.

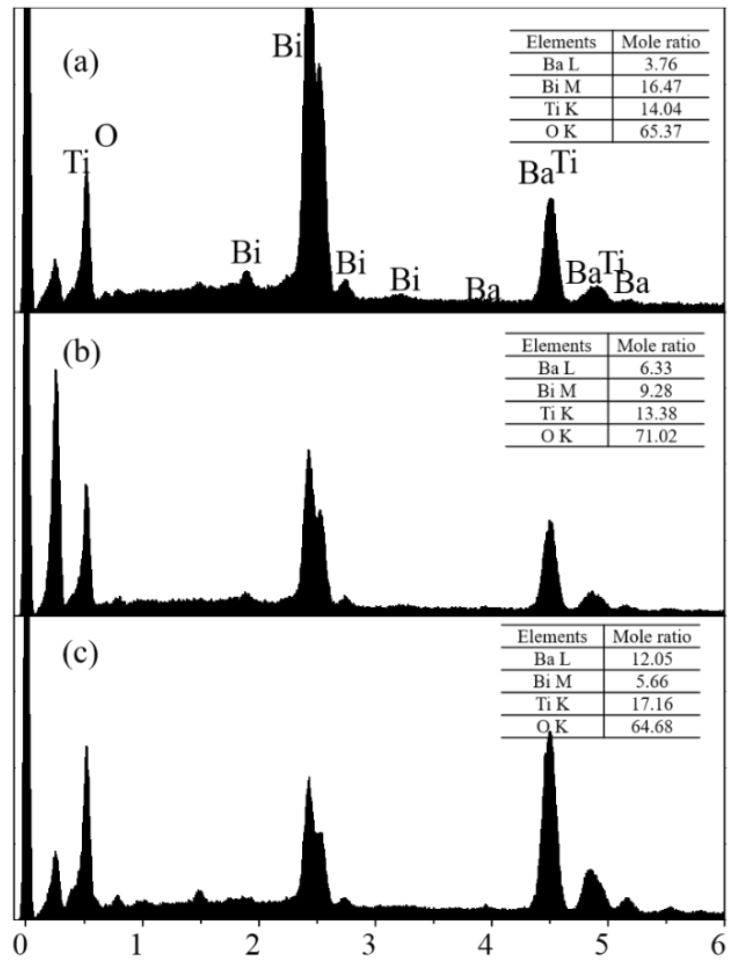

**Figure. S6.** SEM-EDS spectra for (a) BBT-1100, (b) BT/BBT-0.5-1100 and (c) BT/BBT-0.75-1100 samples.

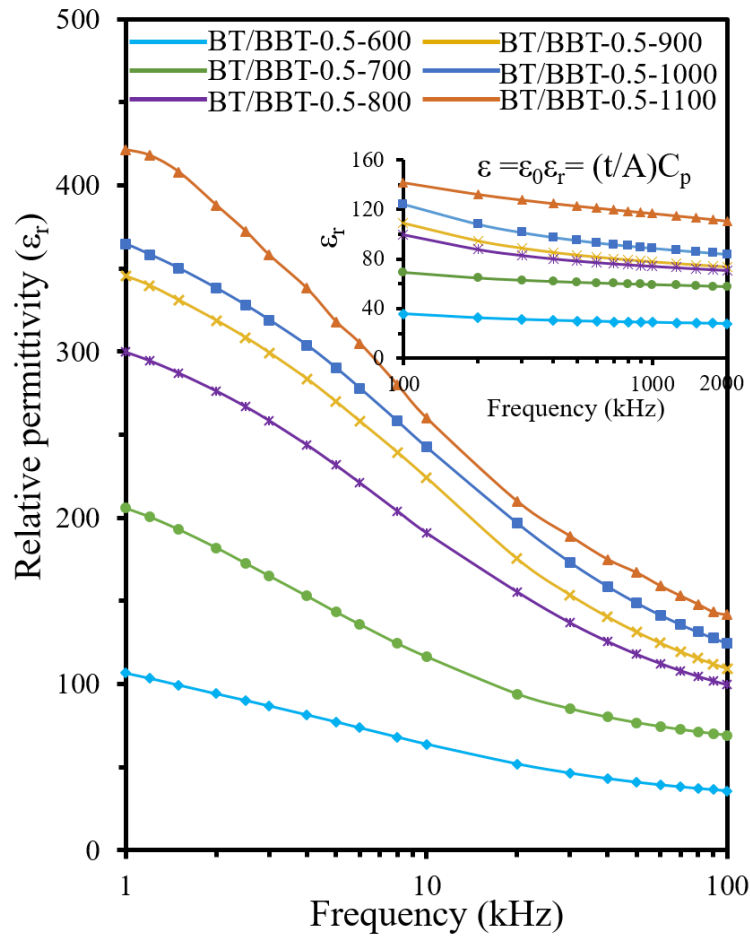

**Figure. S7.** Variations of relative permittivity ( $\epsilon_r$ ) with frequency for BT/BBT-0.5 samples obtained at different temperatures.



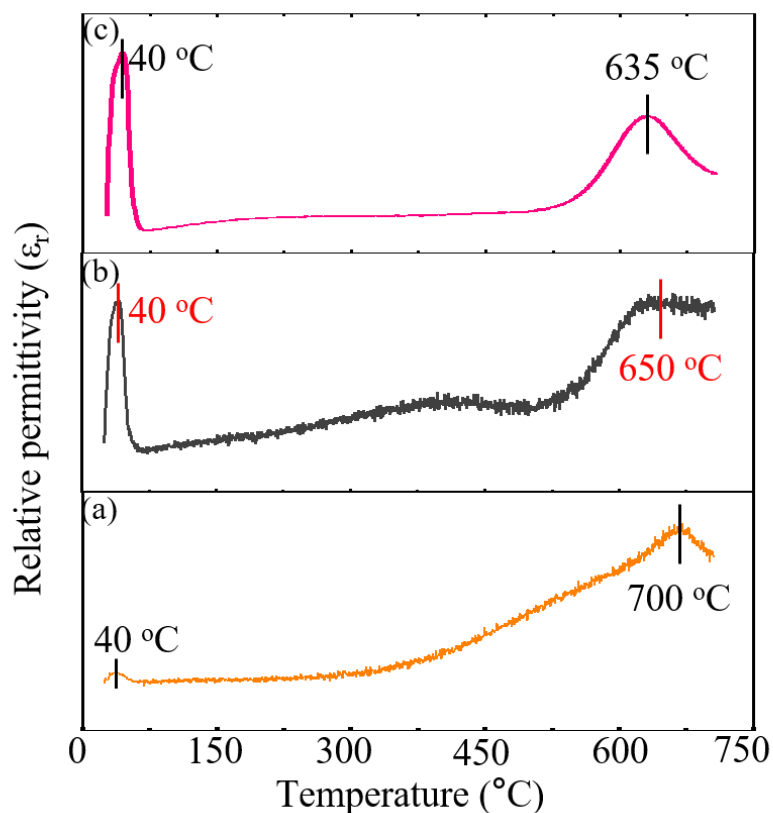

**Figure. S8.** Temperature dependences of relative permittivities ( $\epsilon_r$ ) for (a) BT/BBT-0.5-800, (b) BT/BBT-0.5-900, and (c) BT/BBT-0.5-1100 at measurement frequency of 10 kHz.

**Table S1.** Sizes of BT nanocrystals in BT/BBT-0.5 nanocomposites obtained at different temperatures, and in BT/BBT-0.75-800 nanocomposite and BT-800 mesocrystal.

| Sample         | Size of BT nanocrystal* |        |         |         |
|----------------|-------------------------|--------|---------|---------|
|                | 800 °C                  | 900 °C | 1000 °C | 1100 °C |
| BT/BBT-0.5     | 40 nm                   | 50 nm  | 55 nm   | 70 nm   |
| BT/BBT-0.75    | 70 nm                   | -      | -       | -       |
| BT mesocrystal | 75 nm                   | -      | -       | -       |

\* Scherrer equation (also referred to as the Debye–Scherrer equation) was applied to estimate the sizes of BT nanocrystals in BT/BNT nanocomposites and BT mesocrystal, as shown followed:

$$D(2\theta)_{110} = K\lambda/(B\cos\theta_{110})$$

Where D is the average nanocrystal size, K is a constant (K = 0.89),  $\lambda$  is the wavelength of the X-ray source ( $\lambda = 0.154056$  nm), B is the value of the full width at half maximum (FWHM) of the diffraction peak of plane (110) and  $\theta$  is the Bragg angle.<sup>1-2</sup>

## Reference

1. A. W. Burton, K. Ong, T. Rea and I. Y. Chan, *Microporous Mesoporous Mater.*, 2009, **117**, 75-90.
2. J. S. J. Hargreaves, *Catalysis, Structure & Reactivity*, 2016, **2**, 33-37.
